# Supplementary material
Source: PubMed Central journal article supplement (PMC6939155)
Supplement: NIHMS1534353-supplement-Supplemental_Digital_Content_1.pdf [file NIHMS1534353-supplement-Supplemental_Digital_Content_1.pdf]

**Supplemental Digital Content: Figure 1. Study inclusion criteria**

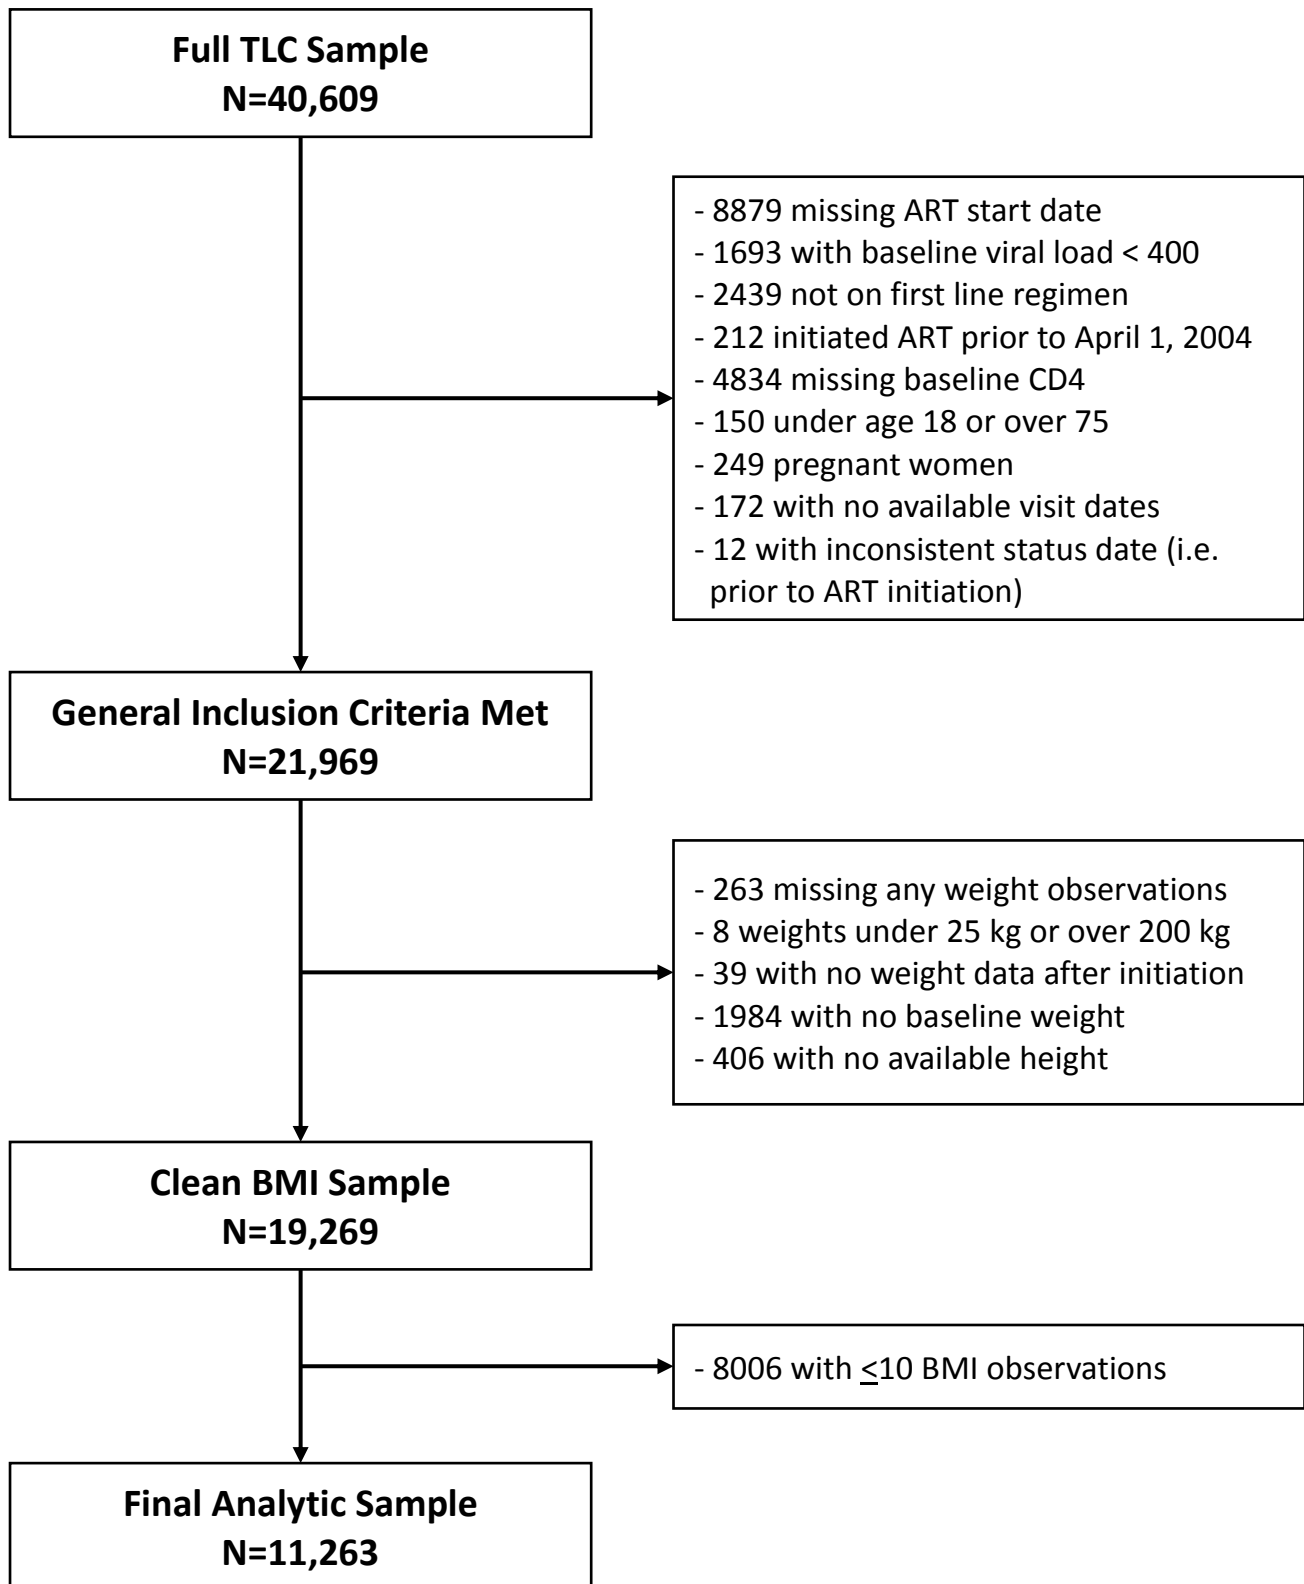

**Supplemental Digital Content: Figure 2. Scatter plot of BMI measurements over eight years by BMI trajectory groups.**

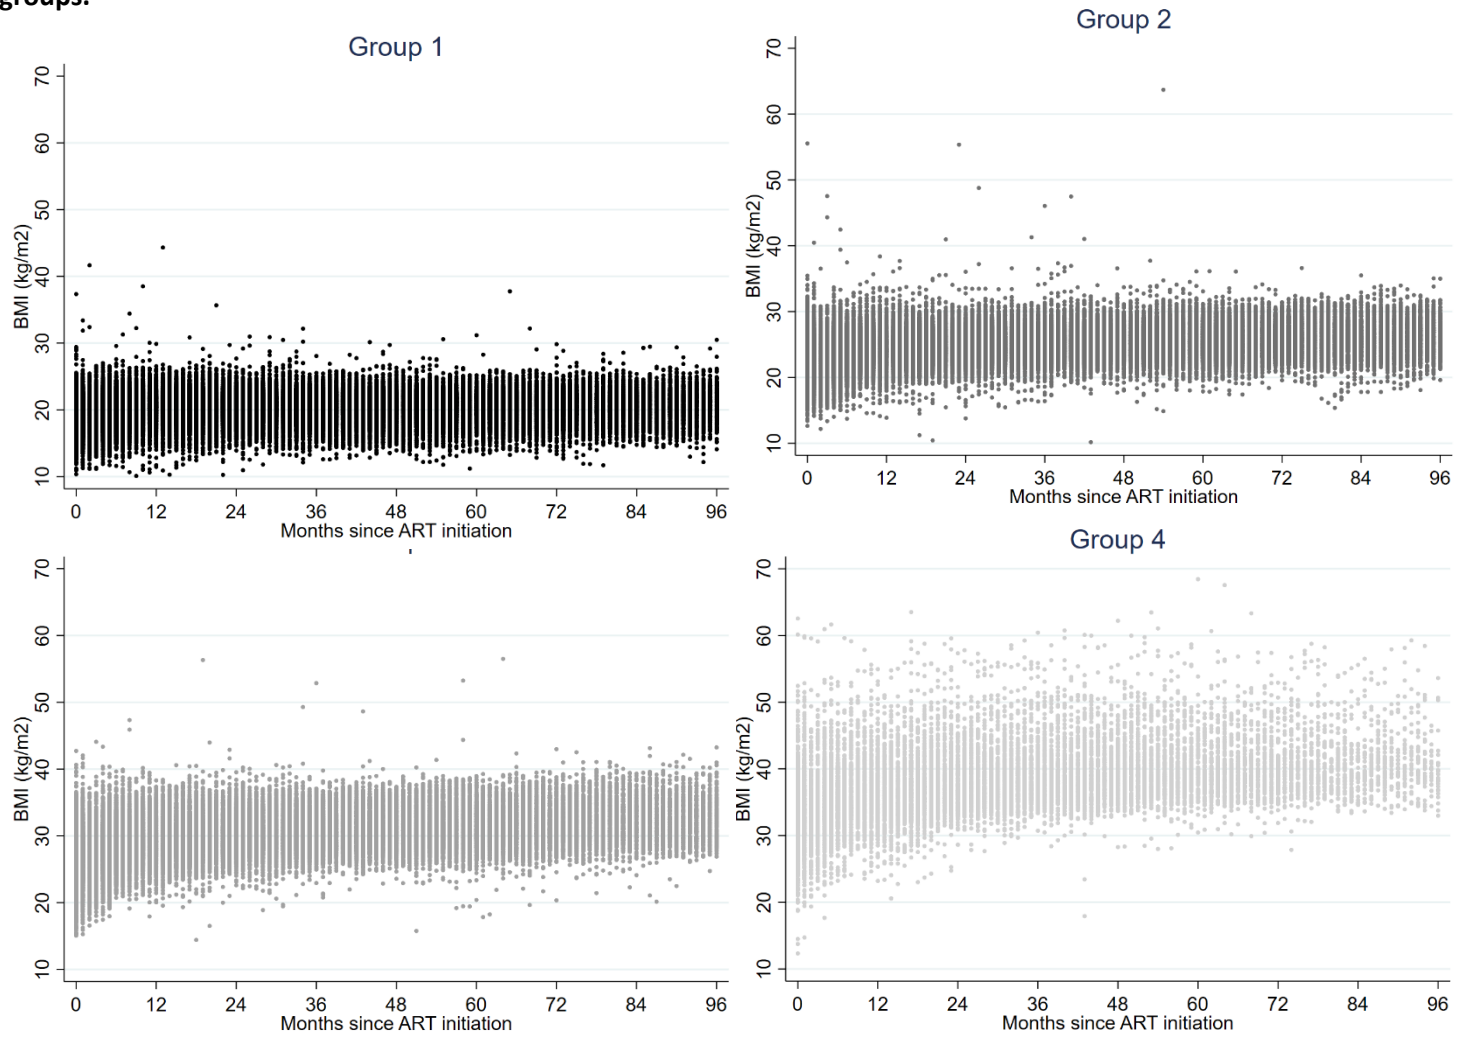

**Supplemental Digital Content: Table 1: Predictors of trajectory group membership (N=11,263)**

| <b>Variable</b>                       | <b>OR*</b>        |
|---------------------------------------|-------------------|
| <b>Group 1 (baseline)</b>             | 1.00              |
| <b>Group 2</b>                        |                   |
| Intercept                             | 1.14 (0.67, 1.95) |
| Male vs. Female                       | 0.95 (0.75, 1.20) |
| Age (years)**                         | 0.97 (0.96, 0.99) |
| CD4 count (cells/mm <sup>3</sup> ) ** | 1.01 (1.01, 1.01) |
| <b>Group 3</b>                        |                   |
| Intercept                             | 1.00 (0.57, 1.76) |
| Male vs. Female                       | 1.00 (0.78, 1.28) |
| Age (years)**                         | 0.97 (0.96, 0.99) |
| CD4 count (cells/mm <sup>3</sup> )**  | 1.01 (1.01, 1.01) |
| <b>Group 4</b>                        |                   |
| Intercept                             | 1.00 (0.53, 1.89) |
| Male vs. Female                       | 1.00 (0.75, 1.33) |
| Age (years)**                         | 0.96 (0.94, 0.97) |
| CD4 count (cells/mm <sup>3</sup> )**  | 1.00 (1.00,1.00)  |

\*ORs derived from log-odds estimates for the risk factors for each group relative to group 1 produced by the trajectory model

\*\*Continuous variable

**Supplemental Digital Content: Table 2.** (A) Transition matrix for BMI at ART initiation and last available BMI for trajectory group 1 (n=3,882)

|                       |             | Last Available BMI |                 |              |             |          | Total |                 |
|-----------------------|-------------|--------------------|-----------------|--------------|-------------|----------|-------|-----------------|
|                       |             | Underweight        | Normal          | Overweight   | Obese I     | Obese II |       | Obese III       |
| BMI at ART Initiation | Underweight | 527<br>(13.6%)     | 982<br>(25.3%)  | 14<br>(0.4%) | -           | -        | -     | 1523<br>(39.2%) |
|                       | Normal      | 225<br>(5.8%)      | 2085<br>(53.7%) | 29<br>(0.8%) | 3<br>(0.1%) | -        | -     | 2342<br>(60.3%) |
|                       | Overweight  | 2<br>(0.1%)        | 12<br>(0.3%)    | 2<br>(0.1%)  | -           | -        | -     | 16<br>(0.4%)    |
|                       | Obese I     | -                  | -               | -            | -           | -        | -     | -               |
|                       | Obese II    | -                  | 1<br>(0.0%)     | -            | -           | -        | -     | -               |
|                       | Obese III   | -                  | -               | -            | -           | -        | -     | -               |
|                       | Total       | 754<br>(19.4%)     | 3080<br>(79.3%) | 45<br>(1.2%) | 3<br>(0.1%) | -        | -     | N=3882          |

**Supplemental Digital Content: Table 3.** (A) Transition matrix for BMI at ART initiation and last available BMI for

|                       |             | Last Available BMI |                 |                 |               |             | Total       |                 |
|-----------------------|-------------|--------------------|-----------------|-----------------|---------------|-------------|-------------|-----------------|
|                       |             | Underweight        | Normal          | Overweight      | Obese I       | Obese II    |             | Obese III       |
| BMI at ART Initiation | Underweight | -                  | 122<br>(2.9%)   | 160<br>(3.8%)   | 14<br>(0.3%)  | -           | 1<br>(0.0%) | 297<br>(7.0%)   |
|                       | Normal      | 8<br>(0.2%)        | 1512<br>(35.5%) | 1586<br>(37.3%) | 114<br>(2.7%) | 2<br>(0.1%) | 3<br>(0.1%) | 3225<br>(75.7%) |
|                       | Overweight  | 6<br>(0.1%)        | 234<br>(5.5%)   | 444<br>(10.4%)  | 20<br>(0.5%)  | -           | -           | 704<br>(16.5%)  |
|                       | Obese I     | -                  | 12<br>(0.3%)    | 18<br>(0.4%)    | -             | -           | -           | 30<br>(0.7%)    |
|                       | Obese II    | -                  | 1<br>(0.0%)     | -               | -             | -           | -           | 1<br>(0.0%)     |
|                       | Obese III   | -                  | 1<br>(0.0%)     | -               | -             | -           | -           | 1<br>(0.0%)     |
|                       | Total       | 14<br>(0.3%)       | 1882<br>(44.2%) | 2208<br>(51.9%) | 148<br>(3.5%) | 2<br>(0.1%) | 4<br>(0.1%) | N=4258          |

trajectory group 2 (n=4,258)

**Supplemental Digital Content: Table 4.** (A) Transition matrix for BMI at ART initiation and last available BMI

|                       |             | Last Available BMI |              |                |                 |                | Total       |                 |
|-----------------------|-------------|--------------------|--------------|----------------|-----------------|----------------|-------------|-----------------|
|                       |             | Underweight        | Normal       | Overweight     | Obese I         | Obese II       |             | Obese III       |
| BMI at ART Initiation | Underweight | -                  | -            | 8<br>(0.3%)    | 18<br>(0.8%)    | 3<br>(0.1%)    | -           | 29<br>(1.21%)   |
|                       | Normal      | -                  | 6<br>(0.3%)  | 261<br>(10.9%) | 362<br>(15.1%)  | 82<br>(3.4%)   | 6<br>(0.3%) | 717<br>(29.9%)  |
|                       | Overweight  | -                  | 9<br>(0.4%)  | 488<br>(20.3%) | 597<br>(24.9%)  | 117<br>(4.9%)  | 3<br>(0.1%) | 1214<br>(50.6%) |
|                       | Obese I     | 1<br>(0.0%)        | 9<br>(0.4%)  | 87<br>(3.6%)   | 253<br>(10.5%)  | 59<br>(2.5%)   | -           | 409<br>(17.0%)  |
|                       | Obese II    | -                  | -            | 4<br>(0.2%)    | 21<br>(0.9%)    | 4<br>(0.2%)    | -           | 29<br>(1.2%)    |
|                       | Obese III   | -                  | -            | 1<br>(0.0%)    | 2<br>(0.1%)     | -              | -           | 3<br>(0.1%)     |
|                       | Total       | 1<br>(0.0%)        | 24<br>(1.0%) | 849<br>(35.4%) | 1253<br>(52.2%) | 265<br>(11.0%) | 9<br>(0.4%) | N=2401          |

trajectory group 3 (n=2,401)

**Supplemental Digital Content: Table 5.** (A) Transition matrix for BMI at ART initiation and last available BMI for trajectory group 4 (n=722).

|                       |             | Last Available BMI |             |             |                |                | Total          |                |
|-----------------------|-------------|--------------------|-------------|-------------|----------------|----------------|----------------|----------------|
|                       |             | Underweight        | Normal      | Overweight  | Obese I        | Obese II       |                | Obese III      |
| BMI at ART Initiation | Underweight | -                  | -           | -           | -              | 2<br>(0.3%)    | 1<br>(0.1%)    | 3<br>(0.4%)    |
|                       | Normal      | -                  | -           | -           | 3<br>(0.4%)    | 28<br>(3.9%)   | 14<br>(1.9%)   | 45<br>(6.2%)   |
|                       | Overweight  | -                  | -           | 1<br>(0.1%) | 15<br>(2.1%)   | 72<br>(10.0%)  | 45<br>(6.2%)   | 133<br>(18.4%) |
|                       | Obese I     | -                  | 1<br>(0.1%) | 4<br>(0.6%) | 68<br>(9.4%)   | 136<br>(18.8%) | 77<br>(10.7%)  | 286<br>(39.6%) |
|                       | Obese II    | -                  | -           | 1<br>(0.1%) | 21<br>(2.9%)   | 79<br>(10.9%)  | 79<br>(10.9%)  | 180<br>(24.9%) |
|                       | Obese III   | -                  | -           | -           | 2<br>(0.3%)    | 15<br>(2.1%)   | 58<br>(8.0%)   | 75<br>(10.4%)  |
|                       | Total       | -                  | 1<br>(0.1%) | 6<br>(0.8%) | 109<br>(15.1%) | 332<br>(46.0%) | 274<br>(38.0%) | N=722          |
